# Supplementary material for: Nonlinear optical effects in two mercury cyanamide/guanidinium chlorides Hg3(NCN)2Cl2and Hg2(C(NH2)3)Cl5
Source: Royal Society of Chemistry journal article supplement (doi:10.1039/d0tc04835f), 2020-12-08
Supplement: d0tc04835f1.pdf [file d0tc04835f1.pdf]

## Supporting information

### Nonlinear optical effects in two mercury cyanamide/guanidinium chlorides $\text{Hg}_3(\text{NCN})_2\text{Cl}_2$ and $\text{Hg}_2(\text{C}(\text{NH}_2)_3)\text{Cl}_5$

Xianji Qiao,<sup>a, ‡</sup> Xiaomeng Liu,<sup>b, ‡</sup> Lkhamsuren Bayarjargal,<sup>c</sup> Alex J. Corkett,<sup>a</sup> Wenyan Wang,<sup>a</sup> Zili Ma,<sup>a</sup> Zheshuai Lin,<sup>\* b</sup> and Richard Dronskowski<sup>\* a d</sup>

<sup>a</sup>Chair of Solid-State and Quantum Chemistry, Institute of Inorganic Chemistry, RWTH Aachen University, 52056 Aachen, Germany

<sup>b</sup>Technical Institute of Physics and Chemistry, Chinese Academy of Sciences 29, Zhong Guan Cun East Road, Beijing, 100190, China

<sup>c</sup>Institute of Geosciences, Goethe University Frankfurt am Main, Frankfurt am Main, Germany

<sup>d</sup>Hoffmann Institute of Advanced Materials, Shenzhen Polytechnic, Shenzhen, China

<sup>‡</sup>Authors equally contributed to this work

#### Corresponding Authors

\* Email: drons@HAL9000.ac.rwth-aachen.de

\* Email: zslin@mail.ipc.ac.cn

**Table S1** Crystallographic data and fractional coordinates (all atoms on 4a) for Hg<sub>3</sub>(NCN)<sub>2</sub>Cl<sub>2</sub> with standard deviations given in parentheses. The thermal displacement parameters of Cl, C and N were constrained to be equal.

| Atom | x          | y           | z          | $U_{\text{iso}}(\text{\AA}^2)$ |
|------|------------|-------------|------------|--------------------------------|
| Hg1  | 0.7088(5)  | 0.0841(3)   | 0.9481(7)  | 0.0174(11)                     |
| Hg2  | 0.9896(6)  | 0.44473(31) | -0.0024(7) | 0.0211(11)                     |
| Hg3  | 0.2302(6)  | 0.2061(4)   | 0.6382(9)  | 0.0198(12)                     |
| Cl1  | 0.0797(28) | 0.1998(24)  | 0.8868(22) | 0.056(6)                       |
| Cl2  | 0.652(3)   | 0.2870(24)  | 0.0694(25) | "                              |
| N1   | 0.206(10)  | 0.031(6)    | 0.607(5)   | "                              |
| C1   | 0.143(6)   | 0.962(7)    | 0.698(7)   | "                              |
| N2   | 0.068(8)   | 0.909(7)    | 0.776(6)   | "                              |
| N3   | 0.195(9)   | 0.386(5)    | 0.142(5)   | "                              |
| C2   | 0.155(10)  | 0.450(5)    | 0.236(6)   | "                              |
| N4   | 0.129(9)   | 0.521(5)    | 0.323(7)   | "                              |

Orthorhombic,  $Pca2_1$  (No. 29),  $Z = 4$ ,  $a = 7.0102(4)$  \AA,  $b = 10.7779(7)$  \AA,  $c = 10.4973(7)$  \AA;  
 $R_{\text{wp}} = 1.797$  %,  $R_{\text{p}} = 1.206$  %.

**Table S2** Selected bond lengths and angles in Hg<sub>3</sub>(NCN)<sub>2</sub>Cl<sub>2</sub> with standard deviations given in parentheses. Note that C–N bond and N–C–N angle restraints were introduced to stabilize the refinement based on the prior (superior) single-crystal data.

| Bond length (\AA) |           | Bond angle (°) |           |
|-------------------|-----------|----------------|-----------|
| Hg1–Cl2           | 2.256(24) | Cl2–Hg1–N2     | 109.3(21) |
| Hg1–N1            | 2.16(6)   | N1–Hg3–N3      | 166.9(26) |
| Hg1–N2            | 2.06(7)   | N1–C1–N2       | 172.7(7)  |
| Hg2–N3            | 2.19(6)   | N3–C2–N4       | 173.3(7)  |
| Hg2–N4            | 2.05(6)   |                |           |
| Hg3–Cl1           | 2.815(26) |                |           |
| Hg3–Cl2           | 2.909(24) |                |           |
| Hg3–N1            | 1.93(6)   |                |           |
| Hg3–N3            | 2.00 (5)  |                |           |
| N1–C1             | 1.277(7)  |                |           |
| C1–N2             | 1.134(7)  |                |           |
| N3–C2             | 1.232(7)  |                |           |
| N4–C2             | 1.205(7)  |                |           |

**Table S3** Crystallographic data and fractional coordinates for  $\text{Hg}_2(\text{C}(\text{NH}_2)_3)\text{Cl}_5$  with standard deviations given in parentheses. The thermal displacement parameters of C, N and H were constrained to be equal. The thermal displacement parameters of H were fixed as  $0.1 \text{ \AA}^2$ .

| Atom | Wyckoff site | <i>x</i>   | <i>y</i>    | <i>z</i>     | $U_{\text{iso}} (\text{\AA}^2)$ |
|------|--------------|------------|-------------|--------------|---------------------------------|
| Hg   | 8 <i>c</i>   | 0.3702(6)  | 0.36957(16) | −0.03790(11) | 0.0429(6)                       |
| Cl1  | 4 <i>a</i>   | 0.8605(31) | ½           | 0            | 0.021(4)                        |
| Cl2  | 8 <i>c</i>   | 0.3679(30) | 0.3120(6)   | 0.0794(5)    | 0.034(3)                        |
| Cl3  | 8 <i>c</i>   | 0.3823(30) | 0.3900(7)   | −0.1601(4)   | 0.030(3)                        |
| C    | 4 <i>b</i>   | 0          | 0.3796(17)  | ¼            | 0.016(8)                        |
| N1   | 8 <i>c</i>   | 0.910(6)   | 0.4279(12)  | 0.1956(8)    | “                               |
| N2   | 4 <i>b</i>   | 0          | 0.2927(17)  | ¼            | “                               |
| H1   | 8 <i>c</i>   | 0.823(12)  | 0.3988(28)  | 0.1510(16)   | 0.1                             |
| H2   | 8 <i>c</i>   | 0.900(12)  | 0.4944(15)  | 0.2015(28)   | “                               |
| H3   | 8 <i>c</i>   | 0.224(6)   | 0.2594(24)  | 0.240(6)     | “                               |

Orthorhombic,  $C222_1$  (No. 20),  $Z = 4$ ,  $a = 4.03993(8) \text{ \AA}$ ,  $b = 14.9618(4) \text{ \AA}$ ,  $c = 18.4060(4) \text{ \AA}$ ;  
 $R_{\text{wp}} = 2.765 \%$ ,  $R_{\text{p}} = 1.744 \%$ .

**Table S4** Selected bond lengths and angles in  $\text{Hg}_2(\text{C}(\text{NH}_2)_3)\text{Cl}_5$  with standard deviations given in parentheses. Note that C–N bond and N–C–N angle restraints were introduced to stabilize the refinement based on the better single-crystal X-ray diffraction data. The N–H bond length restraints were introduced according to the single-crystal neutron-diffraction study on guanidine.

| Bond length (Å) |           | Bond angle (°) |           |
|-----------------|-----------|----------------|-----------|
| Hg1–Cl1         | 2.921(9)  | Cl2–Hg1–Cl3    | 165.9(4)  |
| Hg1–Cl1         | 2.867(9)  | N1–C1–N1       | 111.6(20) |
| Hg1–Cl2         | 2.325(9)  | N1–C1–N2       | 124.2(10) |
| Hg1–Cl3         | 2.270(7)  | C1–N1–H1       | 119.7(23) |
| C1–N1           | 1.287(8)  | C1–N1–H2       | 119.1(24) |
| C1–N2           | 1.300(9)  | C1–N2–H3       | 118.3(16) |
| N1–H1           | 0.994(13) | H1–N1–H2       | 120.7(23) |
| N1–H2           | 1.001(13) | H3–N2–H3       | 123(3)    |
| N2–H3           | 1.050(9)  |                |           |
